# Supplementary material for: The Reticulon-4 3-bp Deletion/Insertion Polymorphism Is Associated with Structural mRNA Changes and the Risk of Breast Cancer: A Population-Based Case–Control Study with Bioinformatics Analysis
Source: MDPI journal article supplement (doi:10.3390/life13071549), 2023-07-12

**Supplementary Figure S1. Sequencing results.** Exemplar DNA sequencing result of RTN4 3-base-pair CAA rs34917480 polymorphism (A) insertion and (B) deletion allele

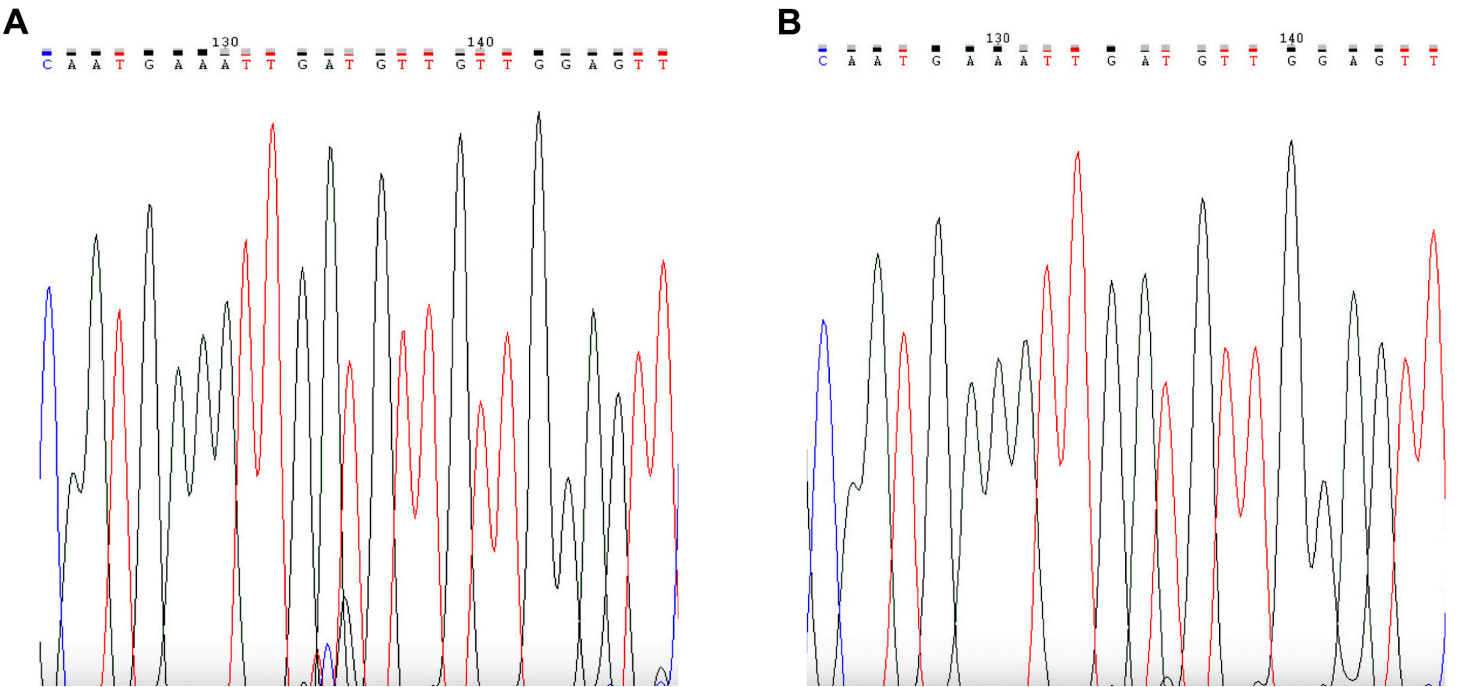

Supplement: s1 [file s1]
