# Supplementary material for: The Reticulon-4 3-bp Deletion/Insertion Polymorphism Is Associated with Structural mRNA Changes and the Risk of Breast Cancer: A Population-Based Case–Control Study with Bioinformatics Analysis
Source: Life (Basel). 2023 Jul 12;13(7):1549. doi: 10.3390/life13071549 (PMC10381770; doi:10.3390/life13071549)
Supplement: Supplementary file 1 [file life-13-01549-s001.zip › Supplementary file S2 - enriched pathways.xlsx]

## Sheet: biologic process
#term ID	term description	observed gene count	background gene count	strength	false discovery rate	matching proteins in your network (IDs)	matching proteins in your network (labels)
GO:0050770	Regulation of axonogenesis	10	187	1.7	3.47e-11	9606.ENSP00000043402,9606.ENSP00000172229,9606.ENSP00000247271,9606.ENSP00000269321,9606.ENSP00000277120,9606.ENSP00000337838,9606.ENSP00000347451,9606.ENSP00000358525,9606.ENSP00000376048,9606.ENSP00000414303	RTN4R,NGFR,OMG,ARHGDIA,NTRK2,RTN4,LINGO1,NGF,MAG,BDNF
GO:0045664	Regulation of neuron differentiation	13	665	1.26	9.27e-11	9606.ENSP00000043402,9606.ENSP00000172229,9606.ENSP00000247271,9606.ENSP00000269321,9606.ENSP00000277120,9606.ENSP00000284981,9606.ENSP00000337838,9606.ENSP00000347451,9606.ENSP00000358059,9606.ENSP00000358525,9606.ENSP00000376048,9606.ENSP00000414303,9606.ENSP00000431418	RTN4R,NGFR,OMG,ARHGDIA,NTRK2,APP,RTN4,LINGO1,RTN4IP1,NGF,MAG,BDNF,NTRK1
GO:0010975	Regulation of neuron projection development	12	510	1.34	9.31e-11	9606.ENSP00000043402,9606.ENSP00000172229,9606.ENSP00000247271,9606.ENSP00000269321,9606.ENSP00000277120,9606.ENSP00000337838,9606.ENSP00000347451,9606.ENSP00000358059,9606.ENSP00000358525,9606.ENSP00000376048,9606.ENSP00000414303,9606.ENSP00000431418	RTN4R,NGFR,OMG,ARHGDIA,NTRK2,RTN4,LINGO1,RTN4IP1,NGF,MAG,BDNF,NTRK1
GO:0120035	Regulation of plasma membrane bounded cell projection organization	13	687	1.25	9.31e-11	9606.ENSP00000043402,9606.ENSP00000172229,9606.ENSP00000247271,9606.ENSP00000269321,9606.ENSP00000277120,9606.ENSP00000284981,9606.ENSP00000337838,9606.ENSP00000347451,9606.ENSP00000358059,9606.ENSP00000358525,9606.ENSP00000376048,9606.ENSP00000414303,9606.ENSP00000431418	RTN4R,NGFR,OMG,ARHGDIA,NTRK2,APP,RTN4,LINGO1,RTN4IP1,NGF,MAG,BDNF,NTRK1
GO:0060284	Regulation of cell development	14	956	1.13	9.31e-11	9606.ENSP00000043402,9606.ENSP00000172229,9606.ENSP00000247271,9606.ENSP00000269321,9606.ENSP00000277120,9606.ENSP00000284981,9606.ENSP00000337838,9606.ENSP00000347451,9606.ENSP00000358059,9606.ENSP00000358525,9606.ENSP00000376048,9606.ENSP00000414303,9606.ENSP00000431418,9606.ENSP00000466933	RTN4R,NGFR,OMG,ARHGDIA,NTRK2,APP,RTN4,LINGO1,RTN4IP1,NGF,MAG,BDNF,NTRK1,S1PR2
GO:0048011	Neurotrophin trk receptor signaling pathway	6	20	2.45	2.89e-10	9606.ENSP00000172229,9606.ENSP00000256637,9606.ENSP00000277120,9606.ENSP00000358525,9606.ENSP00000414303,9606.ENSP00000431418	NGFR,SORT1,NTRK2,NGF,BDNF,NTRK1
GO:0045595	Regulation of cell differentiation	16	1874	0.9	8.7e-10	9606.ENSP00000043402,9606.ENSP00000172229,9606.ENSP00000247271,9606.ENSP00000256637,9606.ENSP00000269321,9606.ENSP00000277120,9606.ENSP00000284981,9606.ENSP00000337838,9606.ENSP00000347451,9606.ENSP00000358059,9606.ENSP00000358525,9606.ENSP00000376048,9606.ENSP00000414303,9606.ENSP00000431418,9606.ENSP00000433623,9606.ENSP00000466933	RTN4R,NGFR,OMG,SORT1,ARHGDIA,NTRK2,APP,RTN4,LINGO1,RTN4IP1,NGF,MAG,BDNF,NTRK1,TRAF6,S1PR2
GO:0050771	Negative regulation of axonogenesis	7	70	1.97	1.23e-09	9606.ENSP00000043402,9606.ENSP00000172229,9606.ENSP00000247271,9606.ENSP00000269321,9606.ENSP00000337838,9606.ENSP00000347451,9606.ENSP00000376048	RTN4R,NGFR,OMG,ARHGDIA,RTN4,LINGO1,MAG
GO:2000026	Regulation of multicellular organismal development	16	2096	0.85	3.49e-09	9606.ENSP00000043402,9606.ENSP00000172229,9606.ENSP00000247271,9606.ENSP00000269321,9606.ENSP00000277120,9606.ENSP00000284981,9606.ENSP00000337838,9606.ENSP00000347451,9606.ENSP00000358059,9606.ENSP00000358525,9606.ENSP00000364847,9606.ENSP00000376048,9606.ENSP00000414303,9606.ENSP00000431418,9606.ENSP00000433623,9606.ENSP00000466933	RTN4R,NGFR,OMG,ARHGDIA,NTRK2,APP,RTN4,LINGO1,RTN4IP1,NGF,MAGED1,MAG,BDNF,NTRK1,TRAF6,S1PR2
GO:0050793	Regulation of developmental process	17	2648	0.78	5.33e-09	9606.ENSP00000043402,9606.ENSP00000172229,9606.ENSP00000247271,9606.ENSP00000256637,9606.ENSP00000269321,9606.ENSP00000277120,9606.ENSP00000284981,9606.ENSP00000337838,9606.ENSP00000347451,9606.ENSP00000358059,9606.ENSP00000358525,9606.ENSP00000364847,9606.ENSP00000376048,9606.ENSP00000414303,9606.ENSP00000431418,9606.ENSP00000433623,9606.ENSP00000466933	RTN4R,NGFR,OMG,SORT1,ARHGDIA,NTRK2,APP,RTN4,LINGO1,RTN4IP1,NGF,MAGED1,MAG,BDNF,NTRK1,TRAF6,S1PR2
GO:0050768	Negative regulation of neurogenesis	9	287	1.47	7.33e-09	9606.ENSP00000043402,9606.ENSP00000172229,9606.ENSP00000247271,9606.ENSP00000269321,9606.ENSP00000284981,9606.ENSP00000337838,9606.ENSP00000347451,9606.ENSP00000376048,9606.ENSP00000414303	RTN4R,NGFR,OMG,ARHGDIA,APP,RTN4,LINGO1,MAG,BDNF
GO:1990090	Cellular response to nerve growth factor stimulus	6	50	2.05	1.47e-08	9606.ENSP00000256637,9606.ENSP00000277120,9606.ENSP00000284981,9606.ENSP00000358525,9606.ENSP00000414303,9606.ENSP00000431418	SORT1,NTRK2,APP,NGF,BDNF,NTRK1
GO:0045665	Negative regulation of neuron differentiation	8	222	1.53	3.19e-08	9606.ENSP00000043402,9606.ENSP00000172229,9606.ENSP00000247271,9606.ENSP00000269321,9606.ENSP00000284981,9606.ENSP00000337838,9606.ENSP00000347451,9606.ENSP00000376048	RTN4R,NGFR,OMG,ARHGDIA,APP,RTN4,LINGO1,MAG
GO:0051239	Regulation of multicellular organismal process	17	3227	0.69	8.35e-08	9606.ENSP00000043402,9606.ENSP00000172229,9606.ENSP00000247271,9606.ENSP00000269321,9606.ENSP00000277120,9606.ENSP00000284981,9606.ENSP00000337838,9606.ENSP00000347451,9606.ENSP00000357480,9606.ENSP00000358059,9606.ENSP00000358525,9606.ENSP00000364847,9606.ENSP00000376048,9606.ENSP00000414303,9606.ENSP00000431418,9606.ENSP00000433623,9606.ENSP00000466933	RTN4R,NGFR,OMG,ARHGDIA,NTRK2,APP,RTN4,LINGO1,NUS1,RTN4IP1,NGF,MAGED1,MAG,BDNF,NTRK1,TRAF6,S1PR2
GO:0022603	Regulation of anatomical structure morphogenesis	12	1095	1.01	9.42e-08	9606.ENSP00000043402,9606.ENSP00000172229,9606.ENSP00000247271,9606.ENSP00000269321,9606.ENSP00000277120,9606.ENSP00000337838,9606.ENSP00000347451,9606.ENSP00000358525,9606.ENSP00000364847,9606.ENSP00000376048,9606.ENSP00000414303,9606.ENSP00000431418	RTN4R,NGFR,OMG,ARHGDIA,NTRK2,RTN4,LINGO1,NGF,MAGED1,MAG,BDNF,NTRK1
GO:0042981	Regulation of apoptotic process	13	1550	0.89	2.67e-07	9606.ENSP00000172229,9606.ENSP00000256637,9606.ENSP00000269321,9606.ENSP00000277120,9606.ENSP00000284981,9606.ENSP00000318585,9606.ENSP00000337838,9606.ENSP00000358525,9606.ENSP00000364847,9606.ENSP00000376048,9606.ENSP00000414303,9606.ENSP00000431418,9606.ENSP00000433623	NGFR,SORT1,ARHGDIA,NTRK2,APP,BACE1,RTN4,NGF,MAGED1,MAG,BDNF,NTRK1,TRAF6
GO:0045596	Negative regulation of cell differentiation	10	728	1.11	5.29e-07	9606.ENSP00000043402,9606.ENSP00000172229,9606.ENSP00000247271,9606.ENSP00000256637,9606.ENSP00000269321,9606.ENSP00000284981,9606.ENSP00000337838,9606.ENSP00000347451,9606.ENSP00000376048,9606.ENSP00000414303	RTN4R,NGFR,OMG,SORT1,ARHGDIA,APP,RTN4,LINGO1,MAG,BDNF
GO:0038180	Nerve growth factor signaling pathway	4	12	2.49	6.66e-07	9606.ENSP00000256637,9606.ENSP00000358525,9606.ENSP00000414303,9606.ENSP00000431418	SORT1,NGF,BDNF,NTRK1
GO:0043523	Regulation of neuron apoptotic process	7	212	1.49	7.42e-07	9606.ENSP00000277120,9606.ENSP00000284981,9606.ENSP00000318585,9606.ENSP00000358525,9606.ENSP00000376048,9606.ENSP00000414303,9606.ENSP00000431418	NTRK2,APP,BACE1,NGF,MAG,BDNF,NTRK1
GO:0010720	Positive regulation of cell development	9	556	1.18	9.8e-07	9606.ENSP00000172229,9606.ENSP00000269321,9606.ENSP00000277120,9606.ENSP00000284981,9606.ENSP00000358525,9606.ENSP00000376048,9606.ENSP00000414303,9606.ENSP00000431418,9606.ENSP00000466933	NGFR,ARHGDIA,NTRK2,APP,NGF,MAG,BDNF,NTRK1,S1PR2
GO:0051094	Positive regulation of developmental process	12	1389	0.91	9.8e-07	9606.ENSP00000172229,9606.ENSP00000269321,9606.ENSP00000277120,9606.ENSP00000284981,9606.ENSP00000337838,9606.ENSP00000358525,9606.ENSP00000364847,9606.ENSP00000376048,9606.ENSP00000414303,9606.ENSP00000431418,9606.ENSP00000433623,9606.ENSP00000466933	NGFR,ARHGDIA,NTRK2,APP,RTN4,NGF,MAGED1,MAG,BDNF,NTRK1,TRAF6,S1PR2
GO:0048666	Neuron development	10	827	1.05	1.5e-06	9606.ENSP00000043402,9606.ENSP00000172229,9606.ENSP00000247271,9606.ENSP00000277120,9606.ENSP00000284981,9606.ENSP00000337838,9606.ENSP00000358525,9606.ENSP00000376048,9606.ENSP00000414303,9606.ENSP00000431418	RTN4R,NGFR,OMG,NTRK2,APP,RTN4,NGF,MAG,BDNF,NTRK1
GO:0043085	Positive regulation of catalytic activity	12	1489	0.88	1.98e-06	9606.ENSP00000043402,9606.ENSP00000172229,9606.ENSP00000269321,9606.ENSP00000277120,9606.ENSP00000284981,9606.ENSP00000357480,9606.ENSP00000358525,9606.ENSP00000364847,9606.ENSP00000414303,9606.ENSP00000431418,9606.ENSP00000433623,9606.ENSP00000466933	RTN4R,NGFR,ARHGDIA,NTRK2,APP,NUS1,NGF,MAGED1,BDNF,NTRK1,TRAF6,S1PR2
GO:0007399	Nervous system development	14	2371	0.74	2.46e-06	9606.ENSP00000043402,9606.ENSP00000172229,9606.ENSP00000247271,9606.ENSP00000269321,9606.ENSP00000277120,9606.ENSP00000284981,9606.ENSP00000337838,9606.ENSP00000347451,9606.ENSP00000358059,9606.ENSP00000358525,9606.ENSP00000376048,9606.ENSP00000414303,9606.ENSP00000431418,9606.ENSP00000433623	RTN4R,NGFR,OMG,ARHGDIA,NTRK2,APP,RTN4,LINGO1,RTN4IP1,NGF,MAG,BDNF,NTRK1,TRAF6
GO:0031175	Neuron projection development	9	680	1.09	4.94e-06	9606.ENSP00000043402,9606.ENSP00000172229,9606.ENSP00000247271,9606.ENSP00000284981,9606.ENSP00000337838,9606.ENSP00000358525,9606.ENSP00000376048,9606.ENSP00000414303,9606.ENSP00000431418	RTN4R,NGFR,OMG,APP,RTN4,NGF,MAG,BDNF,NTRK1
GO:0050769	Positive regulation of neurogenesis	8	479	1.19	6.46e-06	9606.ENSP00000172229,9606.ENSP00000269321,9606.ENSP00000277120,9606.ENSP00000284981,9606.ENSP00000358525,9606.ENSP00000376048,9606.ENSP00000414303,9606.ENSP00000431418	NGFR,ARHGDIA,NTRK2,APP,NGF,MAG,BDNF,NTRK1
GO:0030154	Cell differentiation	16	3702	0.6	6.46e-06	9606.ENSP00000043402,9606.ENSP00000172229,9606.ENSP00000247271,9606.ENSP00000256637,9606.ENSP00000269321,9606.ENSP00000277120,9606.ENSP00000284981,9606.ENSP00000337838,9606.ENSP00000347451,9606.ENSP00000357480,9606.ENSP00000358059,9606.ENSP00000358525,9606.ENSP00000376048,9606.ENSP00000414303,9606.ENSP00000431418,9606.ENSP00000433623	RTN4R,NGFR,OMG,SORT1,ARHGDIA,NTRK2,APP,RTN4,LINGO1,NUS1,RTN4IP1,NGF,MAG,BDNF,NTRK1,TRAF6
GO:0045597	Positive regulation of cell differentiation	10	993	0.97	7.12e-06	9606.ENSP00000172229,9606.ENSP00000269321,9606.ENSP00000277120,9606.ENSP00000284981,9606.ENSP00000358525,9606.ENSP00000376048,9606.ENSP00000414303,9606.ENSP00000431418,9606.ENSP00000433623,9606.ENSP00000466933	NGFR,ARHGDIA,NTRK2,APP,NGF,MAG,BDNF,NTRK1,TRAF6,S1PR2
GO:0071363	Cellular response to growth factor stimulus	8	494	1.18	7.36e-06	9606.ENSP00000172229,9606.ENSP00000256637,9606.ENSP00000277120,9606.ENSP00000284981,9606.ENSP00000357480,9606.ENSP00000358525,9606.ENSP00000414303,9606.ENSP00000431418	NGFR,SORT1,NTRK2,APP,NUS1,NGF,BDNF,NTRK1
GO:0051240	Positive regulation of multicellular organismal process	12	1770	0.8	1.07e-05	9606.ENSP00000172229,9606.ENSP00000269321,9606.ENSP00000277120,9606.ENSP00000284981,9606.ENSP00000337838,9606.ENSP00000357480,9606.ENSP00000358525,9606.ENSP00000364847,9606.ENSP00000376048,9606.ENSP00000414303,9606.ENSP00000431418,9606.ENSP00000433623	NGFR,ARHGDIA,NTRK2,APP,RTN4,NUS1,NGF,MAGED1,MAG,BDNF,NTRK1,TRAF6
GO:0050772	Positive regulation of axonogenesis	5	89	1.72	1.08e-05	9606.ENSP00000172229,9606.ENSP00000269321,9606.ENSP00000277120,9606.ENSP00000358525,9606.ENSP00000414303	NGFR,ARHGDIA,NTRK2,NGF,BDNF
GO:0045860	Positive regulation of protein kinase activity	8	550	1.13	1.44e-05	9606.ENSP00000277120,9606.ENSP00000284981,9606.ENSP00000358525,9606.ENSP00000364847,9606.ENSP00000414303,9606.ENSP00000431418,9606.ENSP00000433623,9606.ENSP00000466933	NTRK2,APP,NGF,MAGED1,BDNF,NTRK1,TRAF6,S1PR2
GO:0120036	Plasma membrane bounded cell projection organization	10	1122	0.92	1.8e-05	9606.ENSP00000043402,9606.ENSP00000172229,9606.ENSP00000247271,9606.ENSP00000284981,9606.ENSP00000337838,9606.ENSP00000358525,9606.ENSP00000376048,9606.ENSP00000414303,9606.ENSP00000431418,9606.ENSP00000466933	RTN4R,NGFR,OMG,APP,RTN4,NGF,MAG,BDNF,NTRK1,S1PR2
GO:1901215	Negative regulation of neuron death	6	211	1.42	1.84e-05	9606.ENSP00000277120,9606.ENSP00000284981,9606.ENSP00000358525,9606.ENSP00000376048,9606.ENSP00000414303,9606.ENSP00000431418	NTRK2,APP,NGF,MAG,BDNF,NTRK1
GO:0045666	Positive regulation of neuron differentiation	7	377	1.24	2.14e-05	9606.ENSP00000172229,9606.ENSP00000269321,9606.ENSP00000277120,9606.ENSP00000284981,9606.ENSP00000358525,9606.ENSP00000414303,9606.ENSP00000431418	NGFR,ARHGDIA,NTRK2,APP,NGF,BDNF,NTRK1
GO:0050790	Regulation of catalytic activity	13	2386	0.71	2.3e-05	9606.ENSP00000043402,9606.ENSP00000172229,9606.ENSP00000256637,9606.ENSP00000269321,9606.ENSP00000277120,9606.ENSP00000284981,9606.ENSP00000357480,9606.ENSP00000358525,9606.ENSP00000364847,9606.ENSP00000414303,9606.ENSP00000431418,9606.ENSP00000433623,9606.ENSP00000466933	RTN4R,NGFR,SORT1,ARHGDIA,NTRK2,APP,NUS1,NGF,MAGED1,BDNF,NTRK1,TRAF6,S1PR2
GO:0061387	Regulation of extent of cell growth	5	113	1.62	2.84e-05	9606.ENSP00000043402,9606.ENSP00000337838,9606.ENSP00000358525,9606.ENSP00000376048,9606.ENSP00000414303	RTN4R,RTN4,NGF,MAG,BDNF
GO:0051241	Negative regulation of multicellular organismal process	10	1231	0.88	3.74e-05	9606.ENSP00000043402,9606.ENSP00000172229,9606.ENSP00000247271,9606.ENSP00000269321,9606.ENSP00000284981,9606.ENSP00000337838,9606.ENSP00000347451,9606.ENSP00000376048,9606.ENSP00000414303,9606.ENSP00000466933	RTN4R,NGFR,OMG,ARHGDIA,APP,RTN4,LINGO1,MAG,BDNF,S1PR2
GO:0061564	Axon development	7	421	1.19	4e-05	9606.ENSP00000043402,9606.ENSP00000172229,9606.ENSP00000284981,9606.ENSP00000337838,9606.ENSP00000376048,9606.ENSP00000414303,9606.ENSP00000431418	RTN4R,NGFR,APP,RTN4,MAG,BDNF,NTRK1
GO:0048468	Cell development	11	1629	0.8	4.28e-05	9606.ENSP00000043402,9606.ENSP00000172229,9606.ENSP00000247271,9606.ENSP00000277120,9606.ENSP00000284981,9606.ENSP00000337838,9606.ENSP00000358525,9606.ENSP00000376048,9606.ENSP00000414303,9606.ENSP00000431418,9606.ENSP00000433623	RTN4R,NGFR,OMG,NTRK2,APP,RTN4,NGF,MAG,BDNF,NTRK1,TRAF6
GO:0043068	Positive regulation of programmed cell death	8	666	1.05	4.92e-05	9606.ENSP00000172229,9606.ENSP00000256637,9606.ENSP00000284981,9606.ENSP00000318585,9606.ENSP00000358525,9606.ENSP00000364847,9606.ENSP00000431418,9606.ENSP00000433623	NGFR,SORT1,APP,BACE1,NGF,MAGED1,NTRK1,TRAF6
GO:0009967	Positive regulation of signal transduction	11	1654	0.79	4.92e-05	9606.ENSP00000043402,9606.ENSP00000172229,9606.ENSP00000277120,9606.ENSP00000284981,9606.ENSP00000337838,9606.ENSP00000358525,9606.ENSP00000364847,9606.ENSP00000414303,9606.ENSP00000431418,9606.ENSP00000433623,9606.ENSP00000466933	RTN4R,NGFR,NTRK2,APP,RTN4,NGF,MAGED1,BDNF,NTRK1,TRAF6,S1PR2
GO:0043406	Positive regulation of map kinase activity	6	265	1.32	5.53e-05	9606.ENSP00000284981,9606.ENSP00000358525,9606.ENSP00000364847,9606.ENSP00000431418,9606.ENSP00000433623,9606.ENSP00000466933	APP,NGF,MAGED1,NTRK1,TRAF6,S1PR2
GO:0050804	Modulation of chemical synaptic transmission	7	446	1.17	5.53e-05	9606.ENSP00000277120,9606.ENSP00000284981,9606.ENSP00000318585,9606.ENSP00000358525,9606.ENSP00000414303,9606.ENSP00000431418,9606.ENSP00000466933	NTRK2,APP,BACE1,NGF,BDNF,NTRK1,S1PR2
GO:0007623	Circadian rhythm	5	142	1.52	7.21e-05	9606.ENSP00000172229,9606.ENSP00000277120,9606.ENSP00000364847,9606.ENSP00000414303,9606.ENSP00000431418	NGFR,NTRK2,MAGED1,BDNF,NTRK1
GO:0060548	Negative regulation of cell death	9	999	0.92	7.21e-05	9606.ENSP00000172229,9606.ENSP00000269321,9606.ENSP00000277120,9606.ENSP00000284981,9606.ENSP00000358525,9606.ENSP00000376048,9606.ENSP00000414303,9606.ENSP00000431418,9606.ENSP00000433623	NGFR,ARHGDIA,NTRK2,APP,NGF,MAG,BDNF,NTRK1,TRAF6
GO:0051129	Negative regulation of cellular component organization	8	713	1.02	7.39e-05	9606.ENSP00000043402,9606.ENSP00000172229,9606.ENSP00000247271,9606.ENSP00000269321,9606.ENSP00000284981,9606.ENSP00000337838,9606.ENSP00000347451,9606.ENSP00000376048	RTN4R,NGFR,OMG,ARHGDIA,APP,RTN4,LINGO1,MAG
GO:0010976	Positive regulation of neuron projection development	6	288	1.29	8.14e-05	9606.ENSP00000172229,9606.ENSP00000269321,9606.ENSP00000277120,9606.ENSP00000358525,9606.ENSP00000414303,9606.ENSP00000431418	NGFR,ARHGDIA,NTRK2,NGF,BDNF,NTRK1
GO:0043524	Negative regulation of neuron apoptotic process	5	148	1.5	8.25e-05	9606.ENSP00000277120,9606.ENSP00000358525,9606.ENSP00000376048,9606.ENSP00000414303,9606.ENSP00000431418	NTRK2,NGF,MAG,BDNF,NTRK1
GO:0048519	Negative regulation of biological process	17	5389	0.47	8.99e-05	9606.ENSP00000043402,9606.ENSP00000172229,9606.ENSP00000247271,9606.ENSP00000256637,9606.ENSP00000269321,9606.ENSP00000277120,9606.ENSP00000284981,9606.ENSP00000318585,9606.ENSP00000337838,9606.ENSP00000347451,9606.ENSP00000358525,9606.ENSP00000364847,9606.ENSP00000376048,9606.ENSP00000414303,9606.ENSP00000431418,9606.ENSP00000433623,9606.ENSP00000466933	RTN4R,NGFR,OMG,SORT1,ARHGDIA,NTRK2,APP,BACE1,RTN4,LINGO1,NGF,MAGED1,MAG,BDNF,NTRK1,TRAF6,S1PR2
GO:1902533	Positive regulation of intracellular signal transduction	9	1041	0.91	9.29e-05	9606.ENSP00000043402,9606.ENSP00000277120,9606.ENSP00000284981,9606.ENSP00000337838,9606.ENSP00000358525,9606.ENSP00000364847,9606.ENSP00000431418,9606.ENSP00000433623,9606.ENSP00000466933	RTN4R,NTRK2,APP,RTN4,NGF,MAGED1,NTRK1,TRAF6,S1PR2
GO:0007169	Transmembrane receptor protein tyrosine kinase signaling pathway	7	518	1.1	0.00012	9606.ENSP00000172229,9606.ENSP00000256637,9606.ENSP00000277120,9606.ENSP00000357480,9606.ENSP00000358525,9606.ENSP00000414303,9606.ENSP00000431418	NGFR,SORT1,NTRK2,NUS1,NGF,BDNF,NTRK1
GO:0051345	Positive regulation of hydrolase activity	8	772	0.98	0.00012	9606.ENSP00000043402,9606.ENSP00000172229,9606.ENSP00000269321,9606.ENSP00000277120,9606.ENSP00000284981,9606.ENSP00000358525,9606.ENSP00000414303,9606.ENSP00000431418	RTN4R,NGFR,ARHGDIA,NTRK2,APP,NGF,BDNF,NTRK1
GO:0046579	Positive regulation of ras protein signal transduction	4	69	1.73	0.00015	9606.ENSP00000043402,9606.ENSP00000337838,9606.ENSP00000358525,9606.ENSP00000431418	RTN4R,RTN4,NGF,NTRK1
GO:0048638	Regulation of developmental growth	6	333	1.22	0.00016	9606.ENSP00000043402,9606.ENSP00000284981,9606.ENSP00000337838,9606.ENSP00000358525,9606.ENSP00000376048,9606.ENSP00000414303	RTN4R,APP,RTN4,NGF,MAG,BDNF
GO:0043410	Positive regulation of mapk cascade	7	543	1.08	0.00016	9606.ENSP00000277120,9606.ENSP00000284981,9606.ENSP00000358525,9606.ENSP00000364847,9606.ENSP00000431418,9606.ENSP00000433623,9606.ENSP00000466933	NTRK2,APP,NGF,MAGED1,NTRK1,TRAF6,S1PR2
GO:0048523	Negative regulation of cellular process	16	4874	0.49	0.00017	9606.ENSP00000043402,9606.ENSP00000172229,9606.ENSP00000247271,9606.ENSP00000256637,9606.ENSP00000269321,9606.ENSP00000277120,9606.ENSP00000284981,9606.ENSP00000337838,9606.ENSP00000347451,9606.ENSP00000358525,9606.ENSP00000364847,9606.ENSP00000376048,9606.ENSP00000414303,9606.ENSP00000431418,9606.ENSP00000433623,9606.ENSP00000466933	RTN4R,NGFR,OMG,SORT1,ARHGDIA,NTRK2,APP,RTN4,LINGO1,NGF,MAGED1,MAG,BDNF,NTRK1,TRAF6,S1PR2
GO:0021675	Nerve development	4	79	1.67	0.00023	9606.ENSP00000172229,9606.ENSP00000358525,9606.ENSP00000414303,9606.ENSP00000431418	NGFR,NGF,BDNF,NTRK1
GO:0046578	Regulation of ras protein signal transduction	5	191	1.39	0.00023	9606.ENSP00000043402,9606.ENSP00000269321,9606.ENSP00000337838,9606.ENSP00000358525,9606.ENSP00000431418	RTN4R,ARHGDIA,RTN4,NGF,NTRK1
GO:0007275	Multicellular organism development	16	5023	0.47	0.00025	9606.ENSP00000043402,9606.ENSP00000172229,9606.ENSP00000247271,9606.ENSP00000256637,9606.ENSP00000269321,9606.ENSP00000277120,9606.ENSP00000284981,9606.ENSP00000337838,9606.ENSP00000347451,9606.ENSP00000357480,9606.ENSP00000358059,9606.ENSP00000358525,9606.ENSP00000376048,9606.ENSP00000414303,9606.ENSP00000431418,9606.ENSP00000433623	RTN4R,NGFR,OMG,SORT1,ARHGDIA,NTRK2,APP,RTN4,LINGO1,NUS1,RTN4IP1,NGF,MAG,BDNF,NTRK1,TRAF6
GO:0043066	Negative regulation of apoptotic process	8	893	0.92	0.0003	9606.ENSP00000172229,9606.ENSP00000269321,9606.ENSP00000277120,9606.ENSP00000358525,9606.ENSP00000376048,9606.ENSP00000414303,9606.ENSP00000431418,9606.ENSP00000433623	NGFR,ARHGDIA,NTRK2,NGF,MAG,BDNF,NTRK1,TRAF6
GO:0042127	Regulation of cell population proliferation	10	1642	0.75	0.00034	9606.ENSP00000172229,9606.ENSP00000277120,9606.ENSP00000284981,9606.ENSP00000337838,9606.ENSP00000358525,9606.ENSP00000364847,9606.ENSP00000414303,9606.ENSP00000431418,9606.ENSP00000433623,9606.ENSP00000466933	NGFR,NTRK2,APP,RTN4,NGF,MAGED1,BDNF,NTRK1,TRAF6,S1PR2
GO:0048731	System development	15	4426	0.5	0.00035	9606.ENSP00000043402,9606.ENSP00000172229,9606.ENSP00000247271,9606.ENSP00000269321,9606.ENSP00000277120,9606.ENSP00000284981,9606.ENSP00000337838,9606.ENSP00000347451,9606.ENSP00000357480,9606.ENSP00000358059,9606.ENSP00000358525,9606.ENSP00000376048,9606.ENSP00000414303,9606.ENSP00000431418,9606.ENSP00000433623	RTN4R,NGFR,OMG,ARHGDIA,NTRK2,APP,RTN4,LINGO1,NUS1,RTN4IP1,NGF,MAG,BDNF,NTRK1,TRAF6
GO:0032501	Multicellular organismal process	18	6933	0.38	0.00038	9606.ENSP00000043402,9606.ENSP00000172229,9606.ENSP00000247271,9606.ENSP00000256637,9606.ENSP00000269321,9606.ENSP00000277120,9606.ENSP00000284981,9606.ENSP00000318585,9606.ENSP00000337838,9606.ENSP00000347451,9606.ENSP00000357480,9606.ENSP00000358059,9606.ENSP00000358525,9606.ENSP00000364847,9606.ENSP00000376048,9606.ENSP00000414303,9606.ENSP00000431418,9606.ENSP00000433623	RTN4R,NGFR,OMG,SORT1,ARHGDIA,NTRK2,APP,BACE1,RTN4,LINGO1,NUS1,RTN4IP1,NGF,MAGED1,MAG,BDNF,NTRK1,TRAF6
GO:0051336	Regulation of hydrolase activity	9	1284	0.81	0.0004	9606.ENSP00000043402,9606.ENSP00000172229,9606.ENSP00000256637,9606.ENSP00000269321,9606.ENSP00000277120,9606.ENSP00000284981,9606.ENSP00000358525,9606.ENSP00000414303,9606.ENSP00000431418	RTN4R,NGFR,SORT1,ARHGDIA,NTRK2,APP,NGF,BDNF,NTRK1
GO:0043065	Positive regulation of apoptotic process	7	660	0.99	0.00047	9606.ENSP00000172229,9606.ENSP00000256637,9606.ENSP00000284981,9606.ENSP00000318585,9606.ENSP00000358525,9606.ENSP00000364847,9606.ENSP00000433623	NGFR,SORT1,APP,BACE1,NGF,MAGED1,TRAF6
GO:0051247	Positive regulation of protein metabolic process	10	1715	0.74	0.00047	9606.ENSP00000172229,9606.ENSP00000277120,9606.ENSP00000284981,9606.ENSP00000341344,9606.ENSP00000358525,9606.ENSP00000364847,9606.ENSP00000414303,9606.ENSP00000431418,9606.ENSP00000433623,9606.ENSP00000466933	NGFR,NTRK2,APP,GGA1,NGF,MAGED1,BDNF,NTRK1,TRAF6,S1PR2
GO:0048518	Positive regulation of biological process	17	6112	0.41	0.00047	9606.ENSP00000043402,9606.ENSP00000172229,9606.ENSP00000256637,9606.ENSP00000269321,9606.ENSP00000277120,9606.ENSP00000284981,9606.ENSP00000318585,9606.ENSP00000337838,9606.ENSP00000341344,9606.ENSP00000357480,9606.ENSP00000358525,9606.ENSP00000364847,9606.ENSP00000376048,9606.ENSP00000414303,9606.ENSP00000431418,9606.ENSP00000433623,9606.ENSP00000466933	RTN4R,NGFR,SORT1,ARHGDIA,NTRK2,APP,BACE1,RTN4,GGA1,NUS1,NGF,MAGED1,MAG,BDNF,NTRK1,TRAF6,S1PR2
GO:0051963	Regulation of synapse assembly	4	106	1.55	0.00062	9606.ENSP00000277120,9606.ENSP00000284981,9606.ENSP00000414303,9606.ENSP00000431418	NTRK2,APP,BDNF,NTRK1
GO:1902531	Regulation of intracellular signal transduction	10	1807	0.71	0.00071	9606.ENSP00000043402,9606.ENSP00000269321,9606.ENSP00000277120,9606.ENSP00000284981,9606.ENSP00000337838,9606.ENSP00000358525,9606.ENSP00000364847,9606.ENSP00000431418,9606.ENSP00000433623,9606.ENSP00000466933	RTN4R,ARHGDIA,NTRK2,APP,RTN4,NGF,MAGED1,NTRK1,TRAF6,S1PR2
GO:0099551	Trans-synaptic signaling by neuropeptide, modulating synaptic transmission	2	2	2.97	0.00073	9606.ENSP00000277120,9606.ENSP00000414303	NTRK2,BDNF
GO:0033138	Positive regulation of peptidyl-serine phosphorylation	4	112	1.52	0.00073	9606.ENSP00000277120,9606.ENSP00000284981,9606.ENSP00000358525,9606.ENSP00000414303	NTRK2,APP,NGF,BDNF
GO:0007611	Learning or memory	5	259	1.25	0.00079	9606.ENSP00000277120,9606.ENSP00000284981,9606.ENSP00000358525,9606.ENSP00000414303,9606.ENSP00000431418	NTRK2,APP,NGF,BDNF,NTRK1
GO:0007166	Cell surface receptor signaling pathway	11	2325	0.64	0.00081	9606.ENSP00000043402,9606.ENSP00000172229,9606.ENSP00000256637,9606.ENSP00000269321,9606.ENSP00000277120,9606.ENSP00000284981,9606.ENSP00000357480,9606.ENSP00000358525,9606.ENSP00000414303,9606.ENSP00000431418,9606.ENSP00000433623	RTN4R,NGFR,SORT1,ARHGDIA,NTRK2,APP,NUS1,NGF,BDNF,NTRK1,TRAF6
GO:0048522	Positive regulation of cellular process	16	5579	0.43	0.00087	9606.ENSP00000043402,9606.ENSP00000172229,9606.ENSP00000256637,9606.ENSP00000269321,9606.ENSP00000277120,9606.ENSP00000284981,9606.ENSP00000318585,9606.ENSP00000337838,9606.ENSP00000357480,9606.ENSP00000358525,9606.ENSP00000364847,9606.ENSP00000376048,9606.ENSP00000414303,9606.ENSP00000431418,9606.ENSP00000433623,9606.ENSP00000466933	RTN4R,NGFR,SORT1,ARHGDIA,NTRK2,APP,BACE1,RTN4,NUS1,NGF,MAGED1,MAG,BDNF,NTRK1,TRAF6,S1PR2
GO:0010646	Regulation of cell communication	13	3514	0.54	0.001	9606.ENSP00000043402,9606.ENSP00000172229,9606.ENSP00000269321,9606.ENSP00000277120,9606.ENSP00000284981,9606.ENSP00000318585,9606.ENSP00000337838,9606.ENSP00000358525,9606.ENSP00000364847,9606.ENSP00000414303,9606.ENSP00000431418,9606.ENSP00000433623,9606.ENSP00000466933	RTN4R,NGFR,ARHGDIA,NTRK2,APP,BACE1,RTN4,NGF,MAGED1,BDNF,NTRK1,TRAF6,S1PR2
GO:0048812	Neuron projection morphogenesis	6	495	1.05	0.0011	9606.ENSP00000043402,9606.ENSP00000172229,9606.ENSP00000284981,9606.ENSP00000358525,9606.ENSP00000414303,9606.ENSP00000431418	RTN4R,NGFR,APP,NGF,BDNF,NTRK1
GO:0023051	Regulation of signaling	13	3553	0.53	0.0011	9606.ENSP00000043402,9606.ENSP00000172229,9606.ENSP00000269321,9606.ENSP00000277120,9606.ENSP00000284981,9606.ENSP00000318585,9606.ENSP00000337838,9606.ENSP00000358525,9606.ENSP00000364847,9606.ENSP00000414303,9606.ENSP00000431418,9606.ENSP00000433623,9606.ENSP00000466933	RTN4R,NGFR,ARHGDIA,NTRK2,APP,BACE1,RTN4,NGF,MAGED1,BDNF,NTRK1,TRAF6,S1PR2
GO:0033619	Membrane protein proteolysis	3	39	1.86	0.0012	9606.ENSP00000172229,9606.ENSP00000318585,9606.ENSP00000433623	NGFR,BACE1,TRAF6
GO:1904646	Cellular response to amyloid-beta	3	39	1.86	0.0012	9606.ENSP00000172229,9606.ENSP00000284981,9606.ENSP00000318585	NGFR,APP,BACE1
GO:0071787	Endoplasmic reticulum tubular network formation	2	4	2.67	0.0015	9606.ENSP00000337838,9606.ENSP00000367050	RTN4,RTN3
GO:0030517	Negative regulation of axon extension	3	43	1.81	0.0015	9606.ENSP00000043402,9606.ENSP00000337838,9606.ENSP00000376048	RTN4R,RTN4,MAG
GO:0071495	Cellular response to endogenous stimulus	8	1181	0.8	0.0016	9606.ENSP00000172229,9606.ENSP00000256637,9606.ENSP00000277120,9606.ENSP00000284981,9606.ENSP00000318585,9606.ENSP00000358525,9606.ENSP00000414303,9606.ENSP00000431418	NGFR,SORT1,NTRK2,APP,BACE1,NGF,BDNF,NTRK1
GO:0051402	Neuron apoptotic process	3	46	1.78	0.0017	9606.ENSP00000172229,9606.ENSP00000284981,9606.ENSP00000358525	NGFR,APP,NGF
GO:0009966	Regulation of signal transduction	12	3107	0.56	0.0017	9606.ENSP00000043402,9606.ENSP00000172229,9606.ENSP00000269321,9606.ENSP00000277120,9606.ENSP00000284981,9606.ENSP00000337838,9606.ENSP00000358525,9606.ENSP00000364847,9606.ENSP00000414303,9606.ENSP00000431418,9606.ENSP00000433623,9606.ENSP00000466933	RTN4R,NGFR,ARHGDIA,NTRK2,APP,RTN4,NGF,MAGED1,BDNF,NTRK1,TRAF6,S1PR2
GO:0031547	Brain-derived neurotrophic factor receptor signaling pathway	2	5	2.57	0.002	9606.ENSP00000277120,9606.ENSP00000414303	NTRK2,BDNF
GO:0032270	Positive regulation of cellular protein metabolic process	9	1635	0.71	0.002	9606.ENSP00000172229,9606.ENSP00000277120,9606.ENSP00000284981,9606.ENSP00000358525,9606.ENSP00000364847,9606.ENSP00000414303,9606.ENSP00000431418,9606.ENSP00000433623,9606.ENSP00000466933	NGFR,NTRK2,APP,NGF,MAGED1,BDNF,NTRK1,TRAF6,S1PR2
GO:0008038	Neuron recognition	3	50	1.75	0.0021	9606.ENSP00000284981,9606.ENSP00000337838,9606.ENSP00000414303	APP,RTN4,BDNF
GO:0009653	Anatomical structure morphogenesis	10	2165	0.63	0.0026	9606.ENSP00000043402,9606.ENSP00000172229,9606.ENSP00000277120,9606.ENSP00000284981,9606.ENSP00000337838,9606.ENSP00000357480,9606.ENSP00000358525,9606.ENSP00000414303,9606.ENSP00000431418,9606.ENSP00000433623	RTN4R,NGFR,NTRK2,APP,RTN4,NUS1,NGF,BDNF,NTRK1,TRAF6
GO:0051099	Positive regulation of binding	4	175	1.33	0.003	9606.ENSP00000284981,9606.ENSP00000358525,9606.ENSP00000414303,9606.ENSP00000433623	APP,NGF,BDNF,TRAF6
GO:1903997	Positive regulation of non-membrane spanning protein tyrosine kinase activity	2	7	2.43	0.0033	9606.ENSP00000277120,9606.ENSP00000414303	NTRK2,BDNF
GO:0032147	Activation of protein kinase activity	5	376	1.09	0.0035	9606.ENSP00000284981,9606.ENSP00000358525,9606.ENSP00000431418,9606.ENSP00000433623,9606.ENSP00000466933	APP,NGF,NTRK1,TRAF6,S1PR2
GO:0042490	Mechanoreceptor differentiation	3	63	1.65	0.0038	9606.ENSP00000277120,9606.ENSP00000414303,9606.ENSP00000431418	NTRK2,BDNF,NTRK1
GO:0007409	Axonogenesis	5	384	1.08	0.0038	9606.ENSP00000043402,9606.ENSP00000172229,9606.ENSP00000284981,9606.ENSP00000414303,9606.ENSP00000431418	RTN4R,NGFR,APP,BDNF,NTRK1
GO:0065008	Regulation of biological quality	13	4042	0.48	0.0038	9606.ENSP00000043402,9606.ENSP00000172229,9606.ENSP00000277120,9606.ENSP00000284981,9606.ENSP00000318585,9606.ENSP00000337838,9606.ENSP00000357480,9606.ENSP00000358525,9606.ENSP00000376048,9606.ENSP00000414303,9606.ENSP00000431418,9606.ENSP00000433623,9606.ENSP00000466933	RTN4R,NGFR,NTRK2,APP,BACE1,RTN4,NUS1,NGF,MAG,BDNF,NTRK1,TRAF6,S1PR2
GO:0051965	Positive regulation of synapse assembly	3	66	1.63	0.0042	9606.ENSP00000277120,9606.ENSP00000414303,9606.ENSP00000431418	NTRK2,BDNF,NTRK1
GO:0061098	Positive regulation of protein tyrosine kinase activity	3	66	1.63	0.0042	9606.ENSP00000277120,9606.ENSP00000284981,9606.ENSP00000414303	NTRK2,APP,BDNF
GO:0048583	Regulation of response to stimulus	13	4114	0.47	0.0045	9606.ENSP00000043402,9606.ENSP00000172229,9606.ENSP00000269321,9606.ENSP00000277120,9606.ENSP00000284981,9606.ENSP00000318585,9606.ENSP00000337838,9606.ENSP00000358525,9606.ENSP00000364847,9606.ENSP00000414303,9606.ENSP00000431418,9606.ENSP00000433623,9606.ENSP00000466933	RTN4R,NGFR,ARHGDIA,NTRK2,APP,BACE1,RTN4,NGF,MAGED1,BDNF,NTRK1,TRAF6,S1PR2
GO:0048668	Collateral sprouting	2	9	2.32	0.0046	9606.ENSP00000284981,9606.ENSP00000414303	APP,BDNF
GO:0060341	Regulation of cellular localization	7	1027	0.8	0.0052	9606.ENSP00000172229,9606.ENSP00000284981,9606.ENSP00000318585,9606.ENSP00000337838,9606.ENSP00000357480,9606.ENSP00000364847,9606.ENSP00000414303	NGFR,APP,BACE1,RTN4,NUS1,MAGED1,BDNF
GO:0071310	Cellular response to organic substance	10	2369	0.59	0.0052	9606.ENSP00000172229,9606.ENSP00000256637,9606.ENSP00000277120,9606.ENSP00000284981,9606.ENSP00000318585,9606.ENSP00000357480,9606.ENSP00000358525,9606.ENSP00000414303,9606.ENSP00000431418,9606.ENSP00000433623	NGFR,SORT1,NTRK2,APP,BACE1,NUS1,NGF,BDNF,NTRK1,TRAF6
GO:0070887	Cellular response to chemical stimulus	11	2919	0.55	0.0052	9606.ENSP00000172229,9606.ENSP00000256637,9606.ENSP00000277120,9606.ENSP00000284981,9606.ENSP00000318585,9606.ENSP00000337838,9606.ENSP00000357480,9606.ENSP00000358525,9606.ENSP00000414303,9606.ENSP00000431418,9606.ENSP00000433623	NGFR,SORT1,NTRK2,APP,BACE1,RTN4,NUS1,NGF,BDNF,NTRK1,TRAF6
GO:0051716	Cellular response to stimulus	16	6489	0.36	0.0052	9606.ENSP00000043402,9606.ENSP00000172229,9606.ENSP00000247271,9606.ENSP00000256637,9606.ENSP00000269321,9606.ENSP00000277120,9606.ENSP00000284981,9606.ENSP00000318585,9606.ENSP00000337838,9606.ENSP00000357480,9606.ENSP00000358525,9606.ENSP00000376048,9606.ENSP00000414303,9606.ENSP00000431418,9606.ENSP00000433623,9606.ENSP00000466933	RTN4R,NGFR,OMG,SORT1,ARHGDIA,NTRK2,APP,BACE1,RTN4,NUS1,NGF,MAG,BDNF,NTRK1,TRAF6,S1PR2
GO:1900122	Positive regulation of receptor binding	2	10	2.27	0.0053	9606.ENSP00000284981,9606.ENSP00000414303	APP,BDNF
GO:0008285	Negative regulation of cell population proliferation	6	696	0.9	0.0053	9606.ENSP00000172229,9606.ENSP00000284981,9606.ENSP00000358525,9606.ENSP00000364847,9606.ENSP00000414303,9606.ENSP00000431418	NGFR,APP,NGF,MAGED1,BDNF,NTRK1
GO:0007422	Peripheral nervous system development	3	75	1.57	0.0056	9606.ENSP00000277120,9606.ENSP00000358525,9606.ENSP00000414303	NTRK2,NGF,BDNF
GO:0012501	Programmed cell death	7	1054	0.79	0.0058	9606.ENSP00000172229,9606.ENSP00000256637,9606.ENSP00000284981,9606.ENSP00000337838,9606.ENSP00000358525,9606.ENSP00000367050,9606.ENSP00000431418	NGFR,SORT1,APP,RTN4,NGF,RTN3,NTRK1
GO:0051896	Regulation of protein kinase b signaling	4	226	1.22	0.0067	9606.ENSP00000277120,9606.ENSP00000284981,9606.ENSP00000337838,9606.ENSP00000431418	NTRK2,APP,RTN4,NTRK1
GO:0048672	Positive regulation of collateral sprouting	2	12	2.19	0.0069	9606.ENSP00000358525,9606.ENSP00000414303	NGF,BDNF
GO:0071287	Cellular response to manganese ion	2	12	2.19	0.0069	9606.ENSP00000284981,9606.ENSP00000318585	APP,BACE1
GO:0042063	Gliogenesis	4	228	1.21	0.0069	9606.ENSP00000277120,9606.ENSP00000284981,9606.ENSP00000337838,9606.ENSP00000376048	NTRK2,APP,RTN4,MAG
GO:0007631	Feeding behavior	3	88	1.5	0.0083	9606.ENSP00000277120,9606.ENSP00000284981,9606.ENSP00000414303	NTRK2,APP,BDNF
GO:0110110	Positive regulation of animal organ morphogenesis	3	89	1.5	0.0085	9606.ENSP00000172229,9606.ENSP00000337838,9606.ENSP00000364847	NGFR,RTN4,MAGED1
GO:0050966	Detection of mechanical stimulus involved in sensory perception of pain	2	14	2.12	0.0088	9606.ENSP00000318585,9606.ENSP00000431418	BACE1,NTRK1
GO:2000027	Regulation of animal organ morphogenesis	4	257	1.16	0.0103	9606.ENSP00000172229,9606.ENSP00000337838,9606.ENSP00000364847,9606.ENSP00000414303	NGFR,RTN4,MAGED1,BDNF
GO:0060191	Regulation of lipase activity	3	99	1.45	0.0113	9606.ENSP00000256637,9606.ENSP00000277120,9606.ENSP00000414303	SORT1,NTRK2,BDNF
GO:0051130	Positive regulation of cellular component organization	7	1209	0.73	0.0121	9606.ENSP00000172229,9606.ENSP00000269321,9606.ENSP00000277120,9606.ENSP00000284981,9606.ENSP00000358525,9606.ENSP00000414303,9606.ENSP00000431418	NGFR,ARHGDIA,NTRK2,APP,NGF,BDNF,NTRK1
GO:0009893	Positive regulation of metabolic process	12	3893	0.46	0.0121	9606.ENSP00000172229,9606.ENSP00000277120,9606.ENSP00000284981,9606.ENSP00000337838,9606.ENSP00000341344,9606.ENSP00000357480,9606.ENSP00000358525,9606.ENSP00000364847,9606.ENSP00000414303,9606.ENSP00000431418,9606.ENSP00000433623,9606.ENSP00000466933	NGFR,NTRK2,APP,RTN4,GGA1,NUS1,NGF,MAGED1,BDNF,NTRK1,TRAF6,S1PR2
GO:0007411	Axon guidance	4	275	1.13	0.0127	9606.ENSP00000172229,9606.ENSP00000284981,9606.ENSP00000414303,9606.ENSP00000431418	NGFR,APP,BDNF,NTRK1
GO:0031293	Membrane protein intracellular domain proteolysis	2	18	2.02	0.013	9606.ENSP00000172229,9606.ENSP00000433623	NGFR,TRAF6
GO:0050789	Regulation of biological process	20	11475	0.21	0.0135	9606.ENSP00000043402,9606.ENSP00000172229,9606.ENSP00000247271,9606.ENSP00000256637,9606.ENSP00000269321,9606.ENSP00000277120,9606.ENSP00000284981,9606.ENSP00000318585,9606.ENSP00000337838,9606.ENSP00000341344,9606.ENSP00000347451,9606.ENSP00000357480,9606.ENSP00000358059,9606.ENSP00000358525,9606.ENSP00000364847,9606.ENSP00000376048,9606.ENSP00000414303,9606.ENSP00000431418,9606.ENSP00000433623,…	RTN4R,NGFR,OMG,SORT1,ARHGDIA,NTRK2,APP,BACE1,RTN4,GGA1,LINGO1,NUS1,RTN4IP1,NGF,MAGED1,MAG,BDNF,NTRK1,TRAF6,S1PR2
GO:0040011	Locomotion	7	1251	0.72	0.0143	9606.ENSP00000172229,9606.ENSP00000277120,9606.ENSP00000284981,9606.ENSP00000337838,9606.ENSP00000376048,9606.ENSP00000414303,9606.ENSP00000431418	NGFR,NTRK2,APP,RTN4,MAG,BDNF,NTRK1
GO:0021782	Glial cell development	3	112	1.4	0.0149	9606.ENSP00000277120,9606.ENSP00000284981,9606.ENSP00000376048	NTRK2,APP,MAG
GO:1903827	Regulation of cellular protein localization	5	568	0.91	0.0176	9606.ENSP00000172229,9606.ENSP00000284981,9606.ENSP00000337838,9606.ENSP00000364847,9606.ENSP00000414303	NGFR,APP,RTN4,MAGED1,BDNF
GO:0007613	Memory	3	122	1.36	0.0185	9606.ENSP00000284981,9606.ENSP00000358525,9606.ENSP00000414303	APP,NGF,BDNF
GO:0006915	Apoptotic process	6	918	0.78	0.019	9606.ENSP00000172229,9606.ENSP00000256637,9606.ENSP00000284981,9606.ENSP00000337838,9606.ENSP00000358525,9606.ENSP00000367050	NGFR,SORT1,APP,RTN4,NGF,RTN3
GO:0010288	Response to lead ion	2	23	1.91	0.0192	9606.ENSP00000284981,9606.ENSP00000318585	APP,BACE1
GO:0032880	Regulation of protein localization	6	934	0.78	0.0207	9606.ENSP00000172229,9606.ENSP00000284981,9606.ENSP00000337838,9606.ENSP00000364847,9606.ENSP00000414303,9606.ENSP00000433623	NGFR,APP,RTN4,MAGED1,BDNF,TRAF6
GO:0050877	Nervous system process	7	1352	0.68	0.0219	9606.ENSP00000277120,9606.ENSP00000284981,9606.ENSP00000318585,9606.ENSP00000358525,9606.ENSP00000376048,9606.ENSP00000414303,9606.ENSP00000431418	NTRK2,APP,BACE1,NGF,MAG,BDNF,NTRK1
GO:0009581	Detection of external stimulus	3	131	1.33	0.022	9606.ENSP00000172229,9606.ENSP00000318585,9606.ENSP00000431418	NGFR,BACE1,NTRK1
GO:1900180	Regulation of protein localization to nucleus	3	131	1.33	0.022	9606.ENSP00000172229,9606.ENSP00000284981,9606.ENSP00000364847	NGFR,APP,MAGED1
GO:0009582	Detection of abiotic stimulus	3	133	1.32	0.0227	9606.ENSP00000172229,9606.ENSP00000318585,9606.ENSP00000431418	NGFR,BACE1,NTRK1
GO:0016048	Detection of temperature stimulus	2	26	1.86	0.0231	9606.ENSP00000172229,9606.ENSP00000431418	NGFR,NTRK1
GO:0043280	Positive regulation of cysteine-type endopeptidase activity involved in apoptotic process	3	136	1.31	0.0239	9606.ENSP00000172229,9606.ENSP00000284981,9606.ENSP00000358525	NGFR,APP,NGF
GO:0071280	Cellular response to copper ion	2	27	1.84	0.0245	9606.ENSP00000284981,9606.ENSP00000318585	APP,BACE1
GO:0010604	Positive regulation of macromolecule metabolic process	11	3600	0.45	0.0259	9606.ENSP00000172229,9606.ENSP00000277120,9606.ENSP00000284981,9606.ENSP00000337838,9606.ENSP00000341344,9606.ENSP00000358525,9606.ENSP00000364847,9606.ENSP00000414303,9606.ENSP00000431418,9606.ENSP00000433623,9606.ENSP00000466933	NGFR,NTRK2,APP,RTN4,GGA1,NGF,MAGED1,BDNF,NTRK1,TRAF6,S1PR2
GO:0007417	Central nervous system development	6	988	0.75	0.0261	9606.ENSP00000043402,9606.ENSP00000172229,9606.ENSP00000277120,9606.ENSP00000284981,9606.ENSP00000337838,9606.ENSP00000376048	RTN4R,NGFR,NTRK2,APP,RTN4,MAG
GO:0031102	Neuron projection regeneration	2	29	1.81	0.0274	9606.ENSP00000247271,9606.ENSP00000376048	OMG,MAG
GO:0031644	Regulation of nervous system process	3	144	1.29	0.0274	9606.ENSP00000284981,9606.ENSP00000376048,9606.ENSP00000466933	APP,MAG,S1PR2
GO:0050806	Positive regulation of synaptic transmission	3	147	1.28	0.0287	9606.ENSP00000277120,9606.ENSP00000284981,9606.ENSP00000431418	NTRK2,APP,NTRK1
GO:0010800	Positive regulation of peptidyl-threonine phosphorylation	2	30	1.79	0.0288	9606.ENSP00000284981,9606.ENSP00000466933	APP,S1PR2
GO:0014047	Glutamate secretion	2	32	1.77	0.0321	9606.ENSP00000277120,9606.ENSP00000414303	NTRK2,BDNF
GO:1900181	Negative regulation of protein localization to nucleus	2	32	1.77	0.0321	9606.ENSP00000284981,9606.ENSP00000364847	APP,MAGED1
GO:1902003	Regulation of amyloid-beta formation	2	32	1.77	0.0321	9606.ENSP00000277120,9606.ENSP00000284981	NTRK2,APP
GO:0000187	Activation of mapk activity	3	157	1.25	0.0334	9606.ENSP00000284981,9606.ENSP00000433623,9606.ENSP00000466933	APP,TRAF6,S1PR2
GO:0051092	Positive regulation of nf-kappab transcription factor activity	3	158	1.25	0.0337	9606.ENSP00000284981,9606.ENSP00000431418,9606.ENSP00000433623	APP,NTRK1,TRAF6
GO:0007202	Activation of phospholipase c activity	2	34	1.74	0.0348	9606.ENSP00000277120,9606.ENSP00000414303	NTRK2,BDNF
GO:0006928	Movement of cell or subcellular component	7	1501	0.64	0.0361	9606.ENSP00000172229,9606.ENSP00000277120,9606.ENSP00000284981,9606.ENSP00000337838,9606.ENSP00000376048,9606.ENSP00000414303,9606.ENSP00000431418	NGFR,NTRK2,APP,RTN4,MAG,BDNF,NTRK1
GO:0008625	Extrinsic apoptotic signaling pathway via death domain receptors	2	35	1.73	0.0365	9606.ENSP00000256637,9606.ENSP00000358525	SORT1,NGF
GO:0030900	Forebrain development	4	387	0.98	0.0365	9606.ENSP00000043402,9606.ENSP00000277120,9606.ENSP00000284981,9606.ENSP00000337838	RTN4R,NTRK2,APP,RTN4
GO:0050794	Regulation of cellular process	19	10932	0.21	0.0373	9606.ENSP00000043402,9606.ENSP00000172229,9606.ENSP00000247271,9606.ENSP00000256637,9606.ENSP00000269321,9606.ENSP00000277120,9606.ENSP00000284981,9606.ENSP00000318585,9606.ENSP00000337838,9606.ENSP00000347451,9606.ENSP00000357480,9606.ENSP00000358059,9606.ENSP00000358525,9606.ENSP00000364847,9606.ENSP00000376048,9606.ENSP00000414303,9606.ENSP00000431418,9606.ENSP00000433623,9606.ENSP00000466933	RTN4R,NGFR,OMG,SORT1,ARHGDIA,NTRK2,APP,BACE1,RTN4,LINGO1,NUS1,RTN4IP1,NGF,MAGED1,MAG,BDNF,NTRK1,TRAF6,S1PR2
GO:0061462	Protein localization to lysosome	2	36	1.71	0.038	9606.ENSP00000256637,9606.ENSP00000337838	SORT1,RTN4
GO:0023052	Signaling	13	5239	0.36	0.0388	9606.ENSP00000043402,9606.ENSP00000172229,9606.ENSP00000256637,9606.ENSP00000269321,9606.ENSP00000277120,9606.ENSP00000284981,9606.ENSP00000357480,9606.ENSP00000358525,9606.ENSP00000376048,9606.ENSP00000414303,9606.ENSP00000431418,9606.ENSP00000433623,9606.ENSP00000466933	RTN4R,NGFR,SORT1,ARHGDIA,NTRK2,APP,NUS1,NGF,MAG,BDNF,NTRK1,TRAF6,S1PR2
GO:1901700	Response to oxygen-containing compound	7	1567	0.62	0.045	9606.ENSP00000172229,9606.ENSP00000256637,9606.ENSP00000277120,9606.ENSP00000284981,9606.ENSP00000318585,9606.ENSP00000431418,9606.ENSP00000433623	NGFR,SORT1,NTRK2,APP,BACE1,NTRK1,TRAF6
GO:0007154	Cell communication	13	5320	0.36	0.045	9606.ENSP00000043402,9606.ENSP00000172229,9606.ENSP00000256637,9606.ENSP00000269321,9606.ENSP00000277120,9606.ENSP00000284981,9606.ENSP00000357480,9606.ENSP00000358525,9606.ENSP00000376048,9606.ENSP00000414303,9606.ENSP00000431418,9606.ENSP00000433623,9606.ENSP00000466933	RTN4R,NGFR,SORT1,ARHGDIA,NTRK2,APP,NUS1,NGF,MAG,BDNF,NTRK1,TRAF6,S1PR2
GO:0007420	Brain development	5	745	0.8	0.0486	9606.ENSP00000043402,9606.ENSP00000277120,9606.ENSP00000284981,9606.ENSP00000337838,9606.ENSP00000376048	RTN4R,NTRK2,APP,RTN4,MAG

## Sheet: molecular function
#term ID	term description	observed gene count	background gene count	strength	false discovery rate	matching proteins in your network (IDs)	matching proteins in your network (labels)
GO:0043121	Neurotrophin binding	4	9	2.62	2.25e-06	9606.ENSP00000172229,9606.ENSP00000256637,9606.ENSP00000277120,9606.ENSP00000431418	NGFR,SORT1,NTRK2,NTRK1
GO:0005030	Neurotrophin receptor activity	3	4	2.84	6e-05	9606.ENSP00000256637,9606.ENSP00000277120,9606.ENSP00000431418	SORT1,NTRK2,NTRK1
GO:0048406	Nerve growth factor binding	3	5	2.75	6.4e-05	9606.ENSP00000172229,9606.ENSP00000256637,9606.ENSP00000431418	NGFR,SORT1,NTRK1
GO:0005165	Neurotrophin receptor binding	3	12	2.37	0.00039	9606.ENSP00000358525,9606.ENSP00000414303,9606.ENSP00000431418	NGF,BDNF,NTRK1
GO:0019899	Enzyme binding	11	2239	0.66	0.0034	9606.ENSP00000172229,9606.ENSP00000256637,9606.ENSP00000269321,9606.ENSP00000277120,9606.ENSP00000284981,9606.ENSP00000318585,9606.ENSP00000337838,9606.ENSP00000341344,9606.ENSP00000376048,9606.ENSP00000431418,9606.ENSP00000433623	NGFR,SORT1,ARHGDIA,NTRK2,APP,BACE1,RTN4,GGA1,MAG,NTRK1,TRAF6
GO:0010465	Nerve growth factor receptor activity	2	2	2.97	0.0035	9606.ENSP00000256637,9606.ENSP00000431418	SORT1,NTRK1
GO:1905576	Ganglioside gt1b binding	2	3	2.79	0.0051	9606.ENSP00000043402,9606.ENSP00000376048	RTN4R,MAG
GO:0005163	Nerve growth factor receptor binding	2	5	2.57	0.0069	9606.ENSP00000358525,9606.ENSP00000414303	NGF,BDNF
GO:0032813	Tumor necrosis factor receptor superfamily binding	3	48	1.77	0.0069	9606.ENSP00000358525,9606.ENSP00000414303,9606.ENSP00000433623	NGF,BDNF,TRAF6
GO:0033218	Amide binding	5	369	1.1	0.0105	9606.ENSP00000043402,9606.ENSP00000172229,9606.ENSP00000284981,9606.ENSP00000318585,9606.ENSP00000376048	RTN4R,NGFR,APP,BACE1,MAG
GO:0005102	Signaling receptor binding	8	1581	0.67	0.0332	9606.ENSP00000284981,9606.ENSP00000347451,9606.ENSP00000358525,9606.ENSP00000376048,9606.ENSP00000414303,9606.ENSP00000431418,9606.ENSP00000433623,9606.ENSP00000466933	APP,LINGO1,NGF,MAG,BDNF,NTRK1,TRAF6,S1PR2
GO:0005126	Cytokine receptor binding	4	264	1.15	0.0345	9606.ENSP00000358525,9606.ENSP00000414303,9606.ENSP00000431418,9606.ENSP00000433623	NGF,BDNF,NTRK1,TRAF6
GO:0005515	Protein binding	16	7026	0.33	0.0384	9606.ENSP00000172229,9606.ENSP00000256637,9606.ENSP00000269321,9606.ENSP00000277120,9606.ENSP00000284981,9606.ENSP00000318585,9606.ENSP00000337838,9606.ENSP00000341344,9606.ENSP00000347451,9606.ENSP00000358525,9606.ENSP00000364847,9606.ENSP00000376048,9606.ENSP00000414303,9606.ENSP00000431418,9606.ENSP00000433623,9606.ENSP00000466933	NGFR,SORT1,ARHGDIA,NTRK2,APP,BACE1,RTN4,GGA1,LINGO1,NGF,MAGED1,MAG,BDNF,NTRK1,TRAF6,S1PR2

## Sheet: KEGG
#term ID	term description	observed gene count	background gene count	strength	false discovery rate	matching proteins in your network (IDs)	matching proteins in your network (labels)
hsa04722	Neurotrophin signaling pathway	8	114	1.82	1.15e-10	9606.ENSP00000172229,9606.ENSP00000256637,9606.ENSP00000269321,9606.ENSP00000277120,9606.ENSP00000358525,9606.ENSP00000414303,9606.ENSP00000431418,9606.ENSP00000433623	NGFR,SORT1,ARHGDIA,NTRK2,NGF,BDNF,NTRK1,TRAF6
hsa04010	MAPK signaling pathway	6	288	1.29	8.2e-05	9606.ENSP00000172229,9606.ENSP00000277120,9606.ENSP00000358525,9606.ENSP00000414303,9606.ENSP00000431418,9606.ENSP00000433623	NGFR,NTRK2,NGF,BDNF,NTRK1,TRAF6
hsa04014	Ras signaling pathway	5	226	1.31	0.00043	9606.ENSP00000172229,9606.ENSP00000277120,9606.ENSP00000358525,9606.ENSP00000414303,9606.ENSP00000431418	NGFR,NTRK2,NGF,BDNF,NTRK1
hsa04151	PI3K-Akt signaling pathway	5	350	1.12	0.0026	9606.ENSP00000172229,9606.ENSP00000277120,9606.ENSP00000358525,9606.ENSP00000414303,9606.ENSP00000431418	NGFR,NTRK2,NGF,BDNF,NTRK1
hsa05010	Alzheimer disease	4	355	1.02	0.0349	9606.ENSP00000284981,9606.ENSP00000318585,9606.ENSP00000337838,9606.ENSP00000367050	APP,BACE1,RTN4,RTN3

## Sheet: REACTOME
#term ID	term description	observed gene count	background gene count	strength	false discovery rate	matching proteins in your network (IDs)	matching proteins in your network (labels)
HSA-193697	p75NTR regulates axonogenesis	8	10	2.87	3.58e-17	9606.ENSP00000043402,9606.ENSP00000172229,9606.ENSP00000247271,9606.ENSP00000269321,9606.ENSP00000337838,9606.ENSP00000347451,9606.ENSP00000358525,9606.ENSP00000376048	RTN4R,NGFR,OMG,ARHGDIA,RTN4,LINGO1,NGF,MAG
HSA-193634	Axonal growth inhibition (RHOA activation)	7	9	2.86	5.08e-15	9606.ENSP00000043402,9606.ENSP00000172229,9606.ENSP00000247271,9606.ENSP00000269321,9606.ENSP00000337838,9606.ENSP00000347451,9606.ENSP00000376048	RTN4R,NGFR,OMG,ARHGDIA,RTN4,LINGO1,MAG
HSA-193704	p75 NTR receptor-mediated signalling	10	96	1.99	5.08e-15	9606.ENSP00000043402,9606.ENSP00000172229,9606.ENSP00000247271,9606.ENSP00000269321,9606.ENSP00000337838,9606.ENSP00000347451,9606.ENSP00000358525,9606.ENSP00000364847,9606.ENSP00000376048,9606.ENSP00000433623	RTN4R,NGFR,OMG,ARHGDIA,RTN4,LINGO1,NGF,MAGED1,MAG,TRAF6
HSA-162582	Signal Transduction	15	2741	0.71	1.65e-06	9606.ENSP00000043402,9606.ENSP00000172229,9606.ENSP00000247271,9606.ENSP00000269321,9606.ENSP00000277120,9606.ENSP00000284981,9606.ENSP00000337838,9606.ENSP00000347451,9606.ENSP00000358525,9606.ENSP00000364847,9606.ENSP00000376048,9606.ENSP00000414303,9606.ENSP00000431418,9606.ENSP00000433623,9606.ENSP00000466933	RTN4R,NGFR,OMG,ARHGDIA,NTRK2,APP,RTN4,LINGO1,NGF,MAGED1,MAG,BDNF,NTRK1,TRAF6,S1PR2
HSA-209563	Axonal growth stimulation	3	4	2.84	1.34e-05	9606.ENSP00000172229,9606.ENSP00000269321,9606.ENSP00000358525	NGFR,ARHGDIA,NGF
HSA-187015	Activation of TRKA receptors	3	6	2.67	2.76e-05	9606.ENSP00000277120,9606.ENSP00000358525,9606.ENSP00000431418	NTRK2,NGF,NTRK1
HSA-209543	p75NTR recruits signalling complexes	3	13	2.33	0.00016	9606.ENSP00000172229,9606.ENSP00000358525,9606.ENSP00000433623	NGFR,NGF,TRAF6
HSA-209560	NF-kB is activated and signals survival	3	13	2.33	0.00016	9606.ENSP00000172229,9606.ENSP00000358525,9606.ENSP00000433623	NGFR,NGF,TRAF6
HSA-205043	NRIF signals cell death from the nucleus	3	16	2.24	0.00022	9606.ENSP00000172229,9606.ENSP00000358525,9606.ENSP00000433623	NGFR,NGF,TRAF6
HSA-204998	Cell death signalling via NRAGE, NRIF and NADE	4	75	1.7	0.00025	9606.ENSP00000172229,9606.ENSP00000358525,9606.ENSP00000364847,9606.ENSP00000433623	NGFR,NGF,MAGED1,TRAF6
HSA-187042	TRKA activation by NGF	2	2	2.97	0.0011	9606.ENSP00000358525,9606.ENSP00000431418	NGF,NTRK1
HSA-205017	NFG and proNGF binds to p75NTR	2	2	2.97	0.0011	9606.ENSP00000172229,9606.ENSP00000358525	NGFR,NGF
HSA-9024909	BDNF activates NTRK2 (TRKB) signaling	2	2	2.97	0.0011	9606.ENSP00000277120,9606.ENSP00000414303	NTRK2,BDNF
HSA-166520	Signaling by NTRKs	4	134	1.44	0.0015	9606.ENSP00000277120,9606.ENSP00000358525,9606.ENSP00000414303,9606.ENSP00000431418	NTRK2,NGF,BDNF,NTRK1
HSA-167021	PLC-gamma1 signalling	2	3	2.79	0.0015	9606.ENSP00000358525,9606.ENSP00000431418	NGF,NTRK1
HSA-193681	Ceramide signalling	2	3	2.79	0.0015	9606.ENSP00000172229,9606.ENSP00000358525	NGFR,NGF
HSA-198745	Signalling to STAT3	2	3	2.79	0.0015	9606.ENSP00000358525,9606.ENSP00000431418	NGF,NTRK1
HSA-9026527	Activated NTRK2 signals through PLCG1	2	4	2.67	0.0018	9606.ENSP00000277120,9606.ENSP00000414303	NTRK2,BDNF
HSA-187024	NGF-independant TRKA activation	2	5	2.57	0.0024	9606.ENSP00000277120,9606.ENSP00000431418	NTRK2,NTRK1
HSA-187706	Signalling to p38 via RIT and RIN	2	5	2.57	0.0024	9606.ENSP00000358525,9606.ENSP00000431418	NGF,NTRK1
HSA-9032759	NTRK2 activates RAC1	2	5	2.57	0.0024	9606.ENSP00000277120,9606.ENSP00000414303	NTRK2,BDNF
HSA-193670	p75NTR negatively regulates cell cycle via SC1	2	6	2.49	0.0028	9606.ENSP00000172229,9606.ENSP00000358525	NGFR,NGF
HSA-205025	NADE modulates death signalling	2	6	2.49	0.0028	9606.ENSP00000172229,9606.ENSP00000358525	NGFR,NGF
HSA-9032845	Activated NTRK2 signals through CDK5	2	6	2.49	0.0028	9606.ENSP00000277120,9606.ENSP00000414303	NTRK2,BDNF
HSA-170984	ARMS-mediated activation	2	7	2.43	0.003	9606.ENSP00000358525,9606.ENSP00000431418	NGF,NTRK1
HSA-193648	NRAGE signals death through JNK	3	58	1.68	0.003	9606.ENSP00000172229,9606.ENSP00000358525,9606.ENSP00000364847	NGFR,NGF,MAGED1
HSA-9028335	Activated NTRK2 signals through PI3K	2	7	2.43	0.003	9606.ENSP00000277120,9606.ENSP00000414303	NTRK2,BDNF
HSA-198203	PI3K/AKT activation	2	9	2.32	0.0042	9606.ENSP00000358525,9606.ENSP00000431418	NGF,NTRK1
HSA-9026519	Activated NTRK2 signals through RAS	2	9	2.32	0.0042	9606.ENSP00000277120,9606.ENSP00000414303	NTRK2,BDNF
HSA-193692	Regulated proteolysis of p75NTR	2	11	2.23	0.0056	9606.ENSP00000172229,9606.ENSP00000433623	NGFR,TRAF6
HSA-9028731	Activated NTRK2 signals through FRS2 and FRS3	2	11	2.23	0.0056	9606.ENSP00000277120,9606.ENSP00000414303	NTRK2,BDNF
HSA-977225	Amyloid fiber formation	3	78	1.55	0.0056	9606.ENSP00000284981,9606.ENSP00000318585,9606.ENSP00000341344	APP,BACE1,GGA1
HSA-170968	Frs2-mediated activation	2	12	2.19	0.006	9606.ENSP00000358525,9606.ENSP00000431418	NGF,NTRK1
HSA-177504	Retrograde neurotrophin signalling	2	14	2.12	0.0076	9606.ENSP00000358525,9606.ENSP00000431418	NGF,NTRK1
HSA-167044	Signalling to RAS	2	20	1.97	0.0139	9606.ENSP00000358525,9606.ENSP00000431418	NGF,NTRK1
HSA-933542	TRAF6 mediated NF-kB activation	2	24	1.89	0.0186	9606.ENSP00000284981,9606.ENSP00000433623	APP,TRAF6
HSA-445989	TAK1 activates NFkB by phosphorylation and activation of IKKs complex	2	32	1.77	0.0304	9606.ENSP00000284981,9606.ENSP00000433623	APP,TRAF6
